# Supplementary figures and images for: A Sulfated Abalone Polysaccharide Inhibited SARS-CoV-2 Infection of Vero E6 Cells In Vitro
Source: MDPI journal article supplement (doi:10.3390/foods11182865), 2022-09-16

## Supplementary material

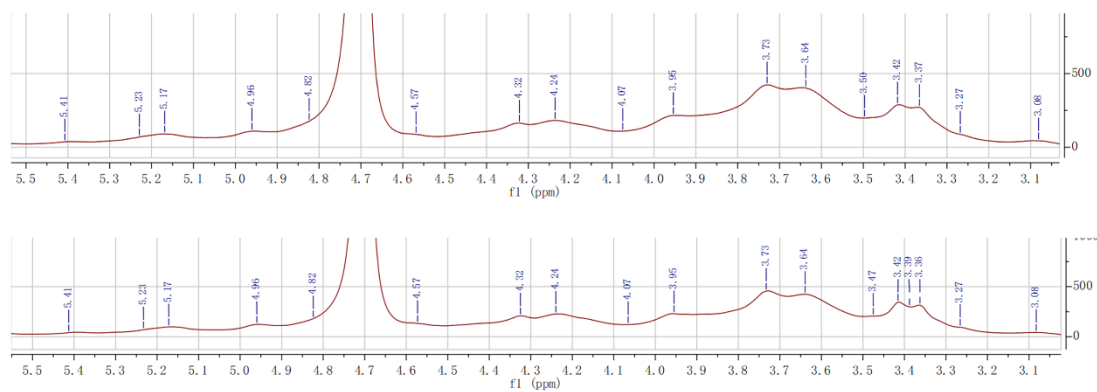

**Figure S1.**  $^1\text{H}$ -NMR spectra of AGSP and S-AGSP.

Supplement: s1 [file s1]
